# Supplementary material
Source: PubMed Central journal article supplement (PMC7808085)

# Supplementary Figure 1

A

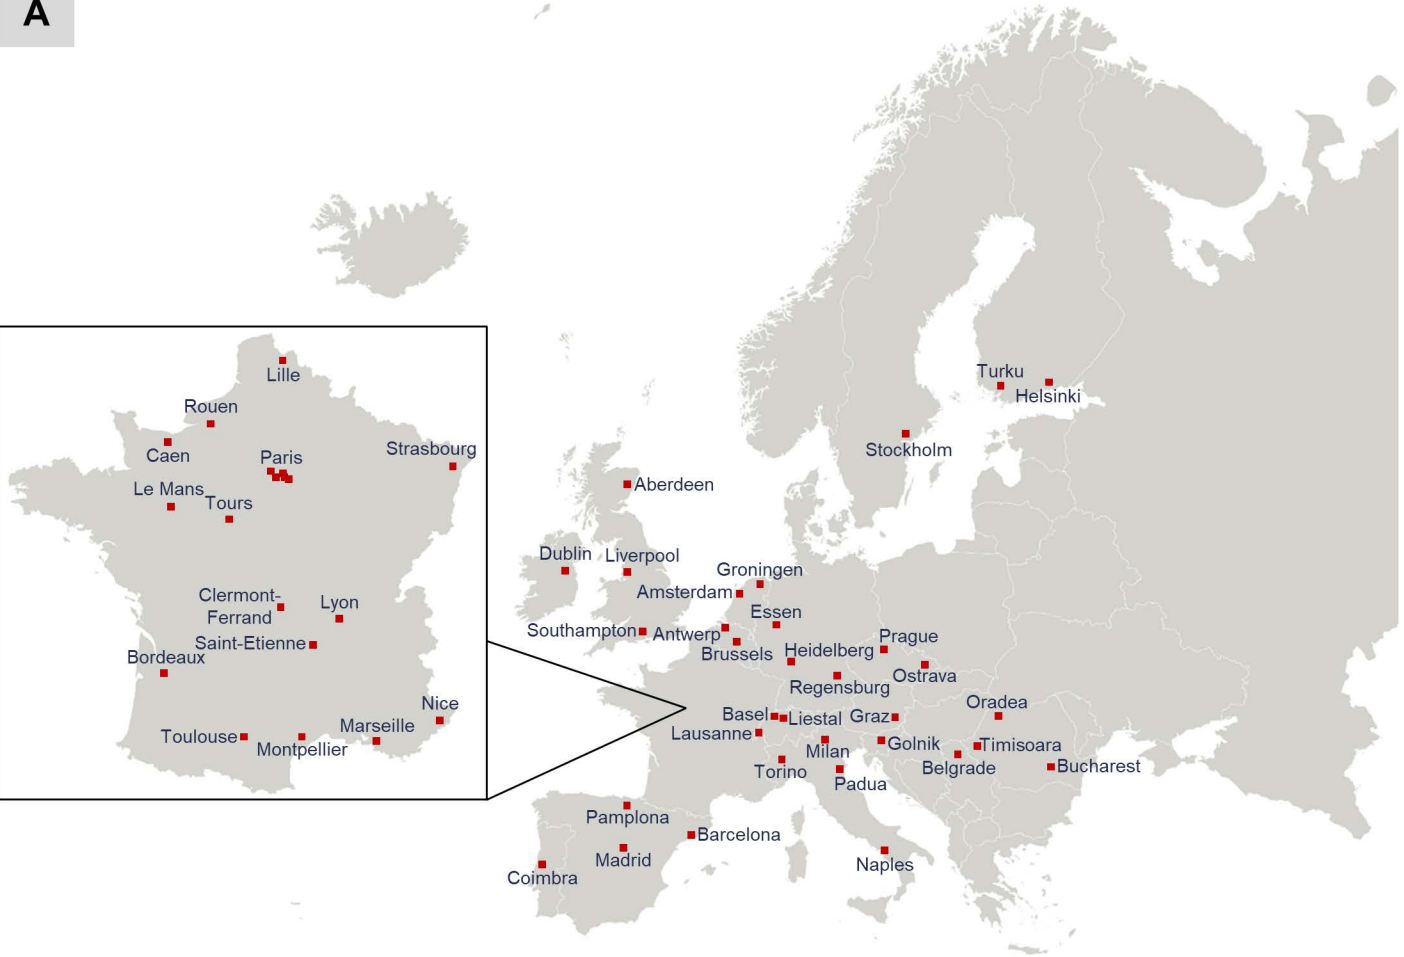

B

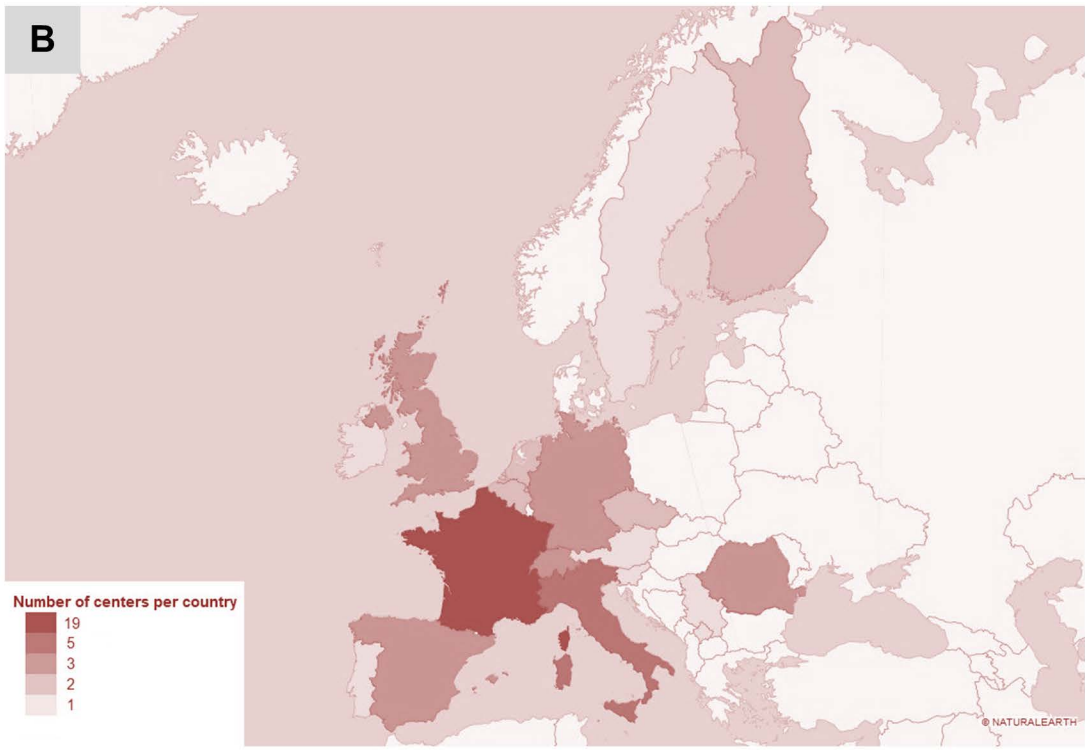

Supplement: mmc1.pdf [file mmc1.pdf]

## Supplementary Figure 2

**A**

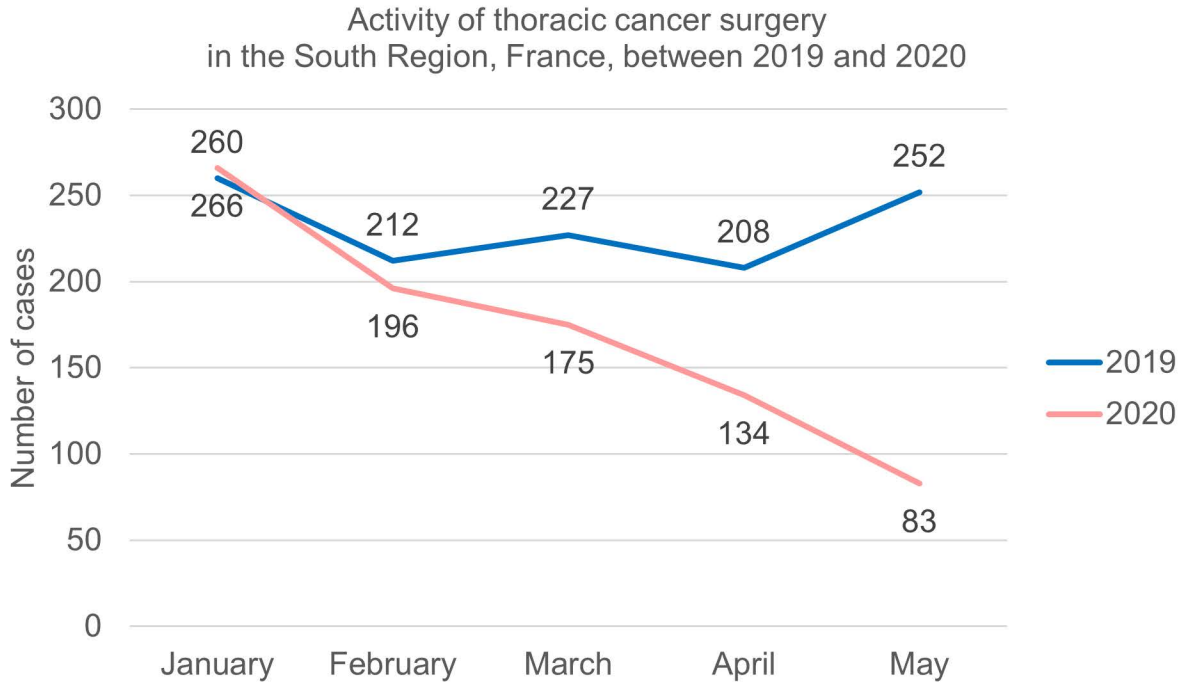

**B**

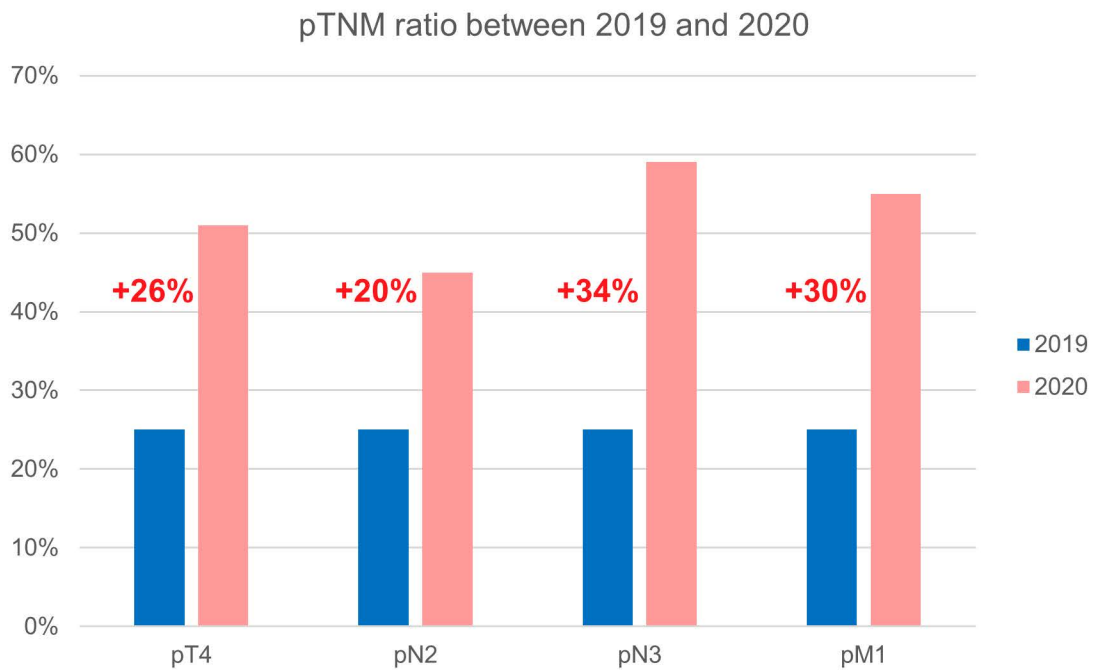

Supplement: mmc2.pdf [file mmc2.pdf]
